# Supplementary material for: Immune-based biomarker accurately predicts response to imiquimod immunotherapy in cervical high-grade squamous intraepithelial lesions
Source: HighWire-hosted journal article supplement (doi:10.1136/jitc-2022-005288), 2022-11-01
Supplement: jitc-2022-005288supp007_data_supplement.xlsx [file jitc-2022-005288supp007_data_supplement.xlsx]

## Sheet: Supplemental Table 2
Supplemental Table 2. T cell and myeloid cell phenotype counts in cHSIL pre- and on imiquimod treatment.
Pre-imiquimod T cells	Cell type	Median NRpre	Min NRpre	Max NRpre		Median PRpre	Min PRpre	Max PRpre		Median CRpre	Min CRpre	Max CRpre
Epithelium CD3+CD8-FOXP3-TBET-PD1-TIM3-	CD4 helper T cell	1.79763	0	177.408		11.5622	0	355.635		15.3695	0	507.624
Epithelium CD3+CD8-FOXP3-TBET+PD1-TIM3-	type 1 CD4 helper T cell	0	0	24.6829		16.935	5.78111	23.8358		8.40394	0	321.638
Epithelium CD3+CD8-FOXP3+TBET-PD1-TIM3-	regulatory T cell	33.5869	3.58047	92.9593		13.4892	3.97263	105.844		0	0	327.754
Epithelium CD3+CD8+FOXP3-TBET-PD1-TIM3-	CD8 T cell	9.16006	0	94.1034		5.78111	0	59.2725		12.5163	0	668.113
Stroma CD3+CD8-FOXP3-TBET-PD1-TIM3-	CD4 helper T cell	12.6802	0.546979	151.845		106.759	4.56347	1222.52		44.6846	0	1093.75
Stroma CD3+CD8-FOXP3-TBET-PD1+TIM3-	activated CD4 helper T cell	0	0	11.8074		0.711728	0	1.4641		5.37671	0	714.912
Stroma CD3+CD8-FOXP3-TBET+PD1-TIM3-	type 1 CD4 helper T cell	1.69087	0	33.0609		31.9443	12.8111	41.7269		15.3779	0	682.683
Stroma CD3+CD8-FOXP3-TBET+PD1+TIM3-	activated type 1 CD4 helper T cell	0	0	23.6149		10.9808	0	17.7932		5.1056	0	158.033
Stroma CD3+CD8-FOXP3+TBET-PD1-TIM3-	regulatory T cell	50.7543	8.19318	282.483		61.9203	22.8174	320.638		3.35952	0	376.269
Stroma CD3+CD8-FOXP3+TBET-PD1+TIM3-	activated regulatory T cell	4.24149	0	53.6028		9.96419	0	30.0141		0.591864	0	278.439
Stroma CD3+CD8-FOXP3+TBET+PD1+TIM3-	activated type 1 regulatory T cell	2.36149	0	25.3605		13.5228	0	15.3731		0	0	237.05
Stroma CD3+CD8+FOXP3-TBET-PD1-TIM3-	CD8 T cell	70.4087	1.51934	165.763		54.803	0	422.393		12.2253	0	475.439
Stroma CD3+CD8+FOXP3-TBET-PD1-TIM3+	activated CD8 T cell	0	0	86.5077		12.8111	0	74.6692		2.10348	0	55.6929
Stroma CD3+CD8+FOXP3-TBET+PD1-TIM3-	type 1 CD8 T cell	0	0	7.49287		0	0	13.1769		1.11984	0	199.553
Stroma CD3+CD8+FOXP3-TBET+PD1+TIM3-	activated type 1 CD8 T cell	1.78344	0	21.2534		0	0	2.19615		2.10348	0	101.593
Post-imiquimod T cells	Cell type	Median NRpost	Min NRpost	Max NRpost		Median PRpost	Min PRpost	Max PRpost		Median CRpost	Min CRpost	Max CRpost
Epithelium CD3+CD8-FOXP3-TBET-PD1-TIM3-	CD4 helper T cell	6.95362	0	214.012		27.3601	0	54.7203		237.14	0	484.387
Epithelium CD3+CD8-FOXP3-TBET+PD1-TIM3-	type 1 CD4 helper T cell	0	0	32.3129		3.04001	0	6.08003		7.34844	0	67.3634
Epithelium CD3+CD8-FOXP3+TBET-PD1-TIM3-	regulatory T cell	11.5952	0	42.8024		0	0	0		21.4326	0	80.7311
Epithelium CD3+CD8+FOXP3-TBET-PD1-TIM3-	CD8 T cell	4.10425	0	22.2159		0	0	0		18.4352	0	854.926
Stroma CD3+CD8-FOXP3-TBET-PD1-TIM3-	CD4 helper T cell	61.1248	6.28607	212.93		73.2887	6.98684	139.591		223.099	8.35502	1756.73
Stroma CD3+CD8-FOXP3-TBET-PD1+TIM3-	activated CD4 helper T cell	3.28481	0	28.5805		5.69757	0	11.3951		4.30867	0	272.206
Stroma CD3+CD8-FOXP3-TBET+PD1-TIM3-	type 1 CD4 helper T cell	8.19762	0	116.733		62.4551	59.3881	65.5221		26.6665	0	73.1064
Stroma CD3+CD8-FOXP3-TBET+PD1+TIM3-	activated type 1 CD4 helper T cell	2.78771	0	35.6684		32.7611	0	65.5221		3.52066	0	259.921
Stroma CD3+CD8-FOXP3+TBET-PD1-TIM3-	regulatory T cell	31.9065	0	349.017		2.84879	0	5.69757		73.0625	2.41846	338.949
Stroma CD3+CD8-FOXP3+TBET-PD1+TIM3-	activated regulatory T cell	4.4798	0	38.2063		0	0	0		1.13248	0	12.5325
Stroma CD3+CD8-FOXP3+TBET+PD1+TIM3-	activated type 1 regulatory T cell	6.38562	0	29.2166		2.84879	0	5.69757		2.84069	0	10.1923
Stroma CD3+CD8+FOXP3-TBET-PD1-TIM3-	CD8 T cell	52.743	0	237.721		1.42439	0	2.84879		105.233	0	603.932
Stroma CD3+CD8+FOXP3-TBET-PD1-TIM3+	activated CD8 T cell	0.444295	0	37.8192		0	0	0		5.12119	0	214.715
Stroma CD3+CD8+FOXP3-TBET+PD1-TIM3-	type 1 CD8 T cell	0	0	19.4555		0	0	0		0	0	73.1064
Stroma CD3+CD8+FOXP3-TBET+PD1+TIM3-	activated type 1 CD8 T cell	0.540274	0	19.8104		0	0	0		1.46157	0	30.215
Pre-imiquimod myeloid cells	Cell type	Median NRpre	Min NRpre	Max NRpre		Median PRpre	Min PRpre	Max PRpre		Median CRpre	Min CRpre	Max CRpre
Epithelium CD68-CD163-CD11c-CD14-CD33+PDL1-	immature myeloid cell	25.968	3.57561	243.371		7.35951	6.76862	82.2828		1.12908	0	241.18
Epithelium CD68-CD163-CD11c-CD14+CD33-PDL1-	monocyte	36.2968	3.70972	389.846		39.2507	21.1584	175.984		51.3996	0	597.42
Epithelium CD68-CD163-CD11c+CD14-CD33-PDL1-	dendritic cell	0	0	18.4086		0	0	0		9.02385	0	107.879
Epithelium CD68-CD163-CD11c+CD14+CD33-PDL1-	inflammatory dendritic cell	0	0	12.6067		0	0	0		0	0	30.8398
Epithelium CD68+CD163-CD11c-CD14-CD33-PDL1-	M1-like macrophage	0	0	40.5235		4.70187	0	7.35951		9.99888	0	1201.88
Epithelium CD68+CD163+CD11c-CD14-CD33-PDL1-	M2-like macrophage	6.80566	0	90.582		4.70187	0	24.5317		0	0	281.587
Epithelium CD68+CD163+CD11c-CD14+CD33-PDL1-	inflammatory M2-like macrophage	1.62313	0	54.826		0	0	4.90634		0.209857	0	450.539
Stroma CD68-CD163-CD11c-CD14-CD33+PDL1-	immature myeloid cell	42.276	6.86743	183.859		4.18056	2.94965	68.5643		8.37676	0	218.565
Stroma CD68-CD163-CD11c-CD14+CD33-PDL1-	monocyte	32.1802	2.94652	635.021		83.6112	34.2821	171.08		76.1263	4.38783	538.354
Stroma CD68-CD163-CD11c+CD14-CD33-PDL1-	dendritic cell	3.08646	0	19.4792		0	0	0		58.1852	0	233.643
Stroma CD68-CD163-CD11c+CD14+CD33-PDL1-	inflammatory dendritic cell	0	0	82.2671		0	0	1.47483		1.99447	0	59.7227
Stroma CD68-CD163+CD11c-CD14-CD33-PDL1-	CD68-CD163+ myeloid cell	6.68733	0	31.2644		58.5279	10.3238	79.9917		3.37995	0	35.7161
Stroma CD68-CD163+CD11c-CD14+CD33-PDL1-	inflammatory CD68-CD163+ myeloid cell	1.02882	0	23.4483		6.27084	2.94965	20.7771		3.62282	0	26.3375
Stroma CD68+CD163-CD11c-CD14-CD33-PDL1-	M1-like macrophage	9.04225	0	259.561		7.27197	1.47483	20.9028		369.536	18.8387	1422.4
Stroma CD68+CD163-CD11c-CD14-CD33+PDL1-	immature M1-like macrophage	1.23465	0	62.2947		0	0	3.11656		7.18008	0	727.487
Stroma CD68+CD163-CD11c-CD14+CD33-PDL1-	inflammatory M1-like macrophage	0	0	19.4792		3.11656	0	6.27084		10.9625	0	145.27
Stroma CD68+CD163+CD11c-CD14-CD33-PDL1-	M2-like macrophage	104.94	1.23465	389.342		71.6808	5.89931	572.737		55.7436	0	778.66
Stroma CD68+CD163+CD11c-CD14-CD33+PDL1-	immature M2-like macrophage	27.3564	0	122.251		21.8159	0	45.9862		0	0	291.997
Stroma CD68+CD163+CD11c-CD14+CD33-PDL1-	inflammatory M2-like macrophage	3.01408	0	391.937		11.4274	4.42448	56.4376		29.6816	0	697.549
Post-imiquimod myeloid cells	Cell type	Median NRpost	Min NRpost	Max NRpost		Median PRpost	Min PRpost	Max PRpost		Median CRpost	Min CRpost	Max CRpost
Epithelium CD68-CD163-CD11c-CD14-CD33+PDL1-	immature myeloid cell	6.17124	0	107.949		9.87868	9.34214	10.4152		18.9547	0	138.668
Epithelium CD68-CD163-CD11c-CD14+CD33-PDL1-	monocyte	51.7364	0	437.832		77.5777	9.34214	145.813		51.5622	5.33339	718.443
Epithelium CD68-CD163-CD11c+CD14-CD33-PDL1-	dendritic cell	0	0	17.2799		0	0	0		0.623826	0	19.9754
Epithelium CD68-CD163-CD11c+CD14+CD33-PDL1-	inflammatory dendritic cell	2.47807	0	37.372		10.4152	0	20.8305		1.98316	0	46.8107
Epithelium CD68+CD163-CD11c-CD14-CD33-PDL1-	M1-like macrophage	3.08701	0	33.1653		4.67107	0	9.34214		4.39642	0	94.7734
Epithelium CD68+CD163+CD11c-CD14-CD33-PDL1-	M2-like macrophage	0	0	60.803		0	0	0		0	0	94.7734
Epithelium CD68+CD163+CD11c-CD14+CD33-PDL1-	inflammatory M2-like macrophage	0	0	11.0551		0	0	0		0	0	0
Stroma CD68-CD163-CD11c-CD14-CD33+PDL1-	immature myeloid cell	21.1427	0	93.4961		29.3021	8.94686	49.6574		55.4579	0	666.734
Stroma CD68-CD163-CD11c-CD14+CD33-PDL1-	monocyte	136.648	20.6728	558.427		230.482	10.7362	450.227		184.185	13.0102	850.255
Stroma CD68-CD163-CD11c+CD14-CD33-PDL1-	dendritic cell	4.18655	0	34.1641		4.47343	0	8.94686		13.9594	0	782.218
Stroma CD68-CD163-CD11c+CD14+CD33-PDL1-	inflammatory dendritic cell	3.99362	0	45.7926		23.4417	7.15749	39.7259		3.06964	0	127.338
Stroma CD68-CD163+CD11c-CD14-CD33-PDL1-	CD68-CD163+ myeloid cell	0	0	4.45619		26.8406	0	53.6812		0.699409	0	32.0616
Stroma CD68-CD163+CD11c-CD14+CD33-PDL1-	inflammatory CD68-CD163+ myeloid cell	1.15436	0	8.64249		4.47343	0	8.94686		1.69868	0	17.3306
Stroma CD68+CD163-CD11c-CD14-CD33-PDL1-	M1-like macrophage	18.3872	0	316.63		138.408	6.62099	270.195		73.6713	0	818.634
Stroma CD68+CD163-CD11c-CD14-CD33+PDL1-	immature M1-like macrophage	2.18916	0	26.6825		3.57875	0	7.15749		2.79189	0	265.867
Stroma CD68+CD163-CD11c-CD14+CD33-PDL1-	inflammatory M1-like macrophage	0.392841	0	8.91238		3.3105	0	6.62099		8.92656	0	46.7138
Stroma CD68+CD163+CD11c-CD14-CD33-PDL1-	M2-like macrophage	19.4861	0	144.565		303.657	13.242	594.072		19.516	0	360.477
Stroma CD68+CD163+CD11c-CD14-CD33+PDL1-	immature M2-like macrophage	0	0	14.9279		9.70742	3.3105	16.1044		0.849342	0	34.4479
Stroma CD68+CD163+CD11c-CD14+CD33-PDL1-	inflammatory M2-like macrophage	14.3654	0	41.9297		29.9728	26.8406	33.105		16.0106	0	75.3881
